# Supplementary material for: RNA splicing analysis deciphers developmental hierarchies and reveals therapeutic targets in adult glioma
Source: PubMed Central journal article supplement (PMC11142752; doi:10.1172/jci173789), 2024-04-25

Full unedited gel for Figure 2I

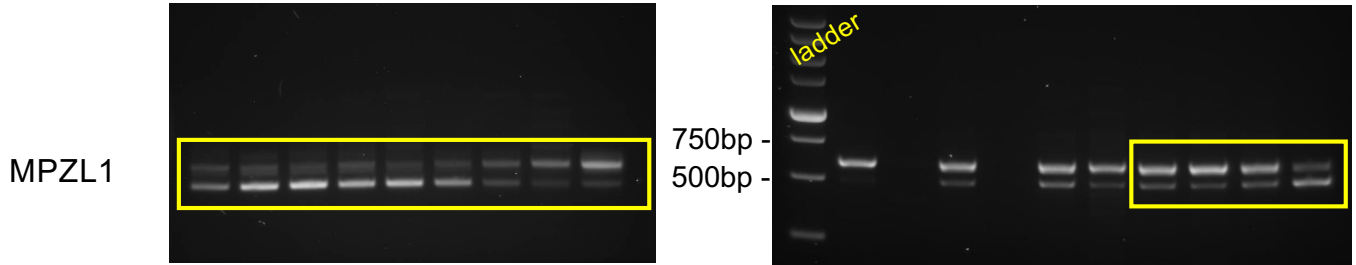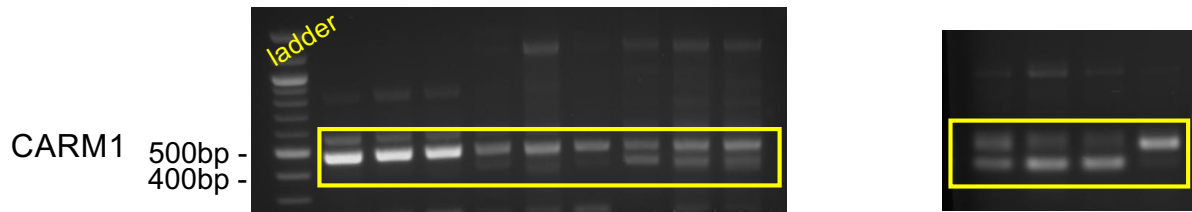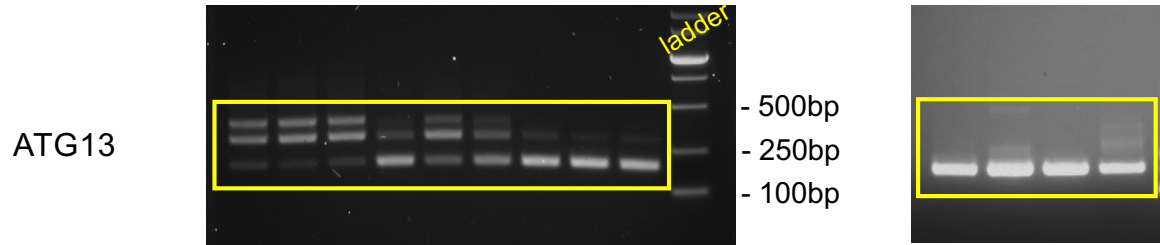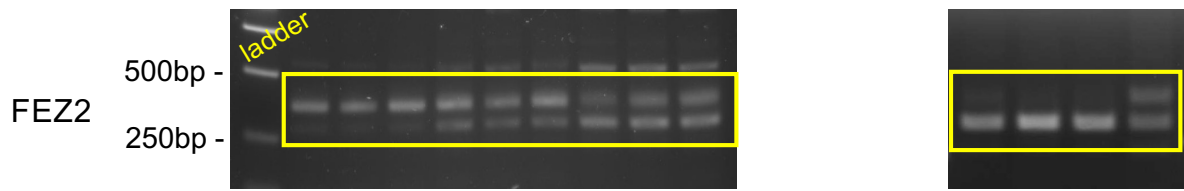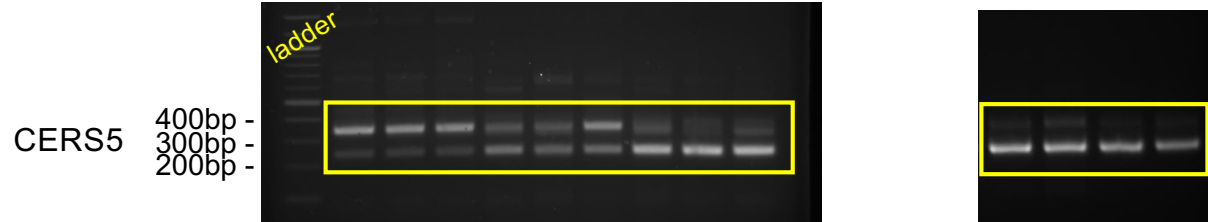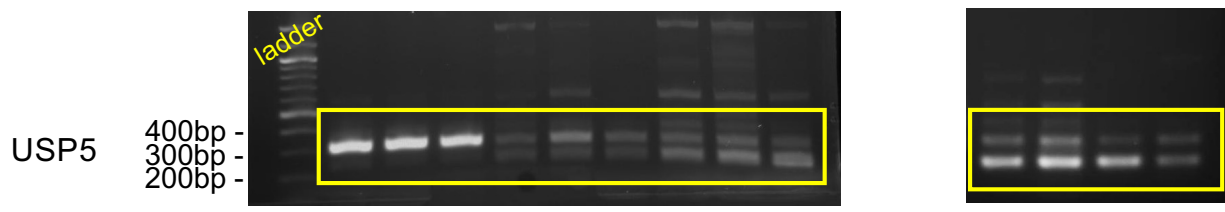

Full unedited gel for Figure 2I

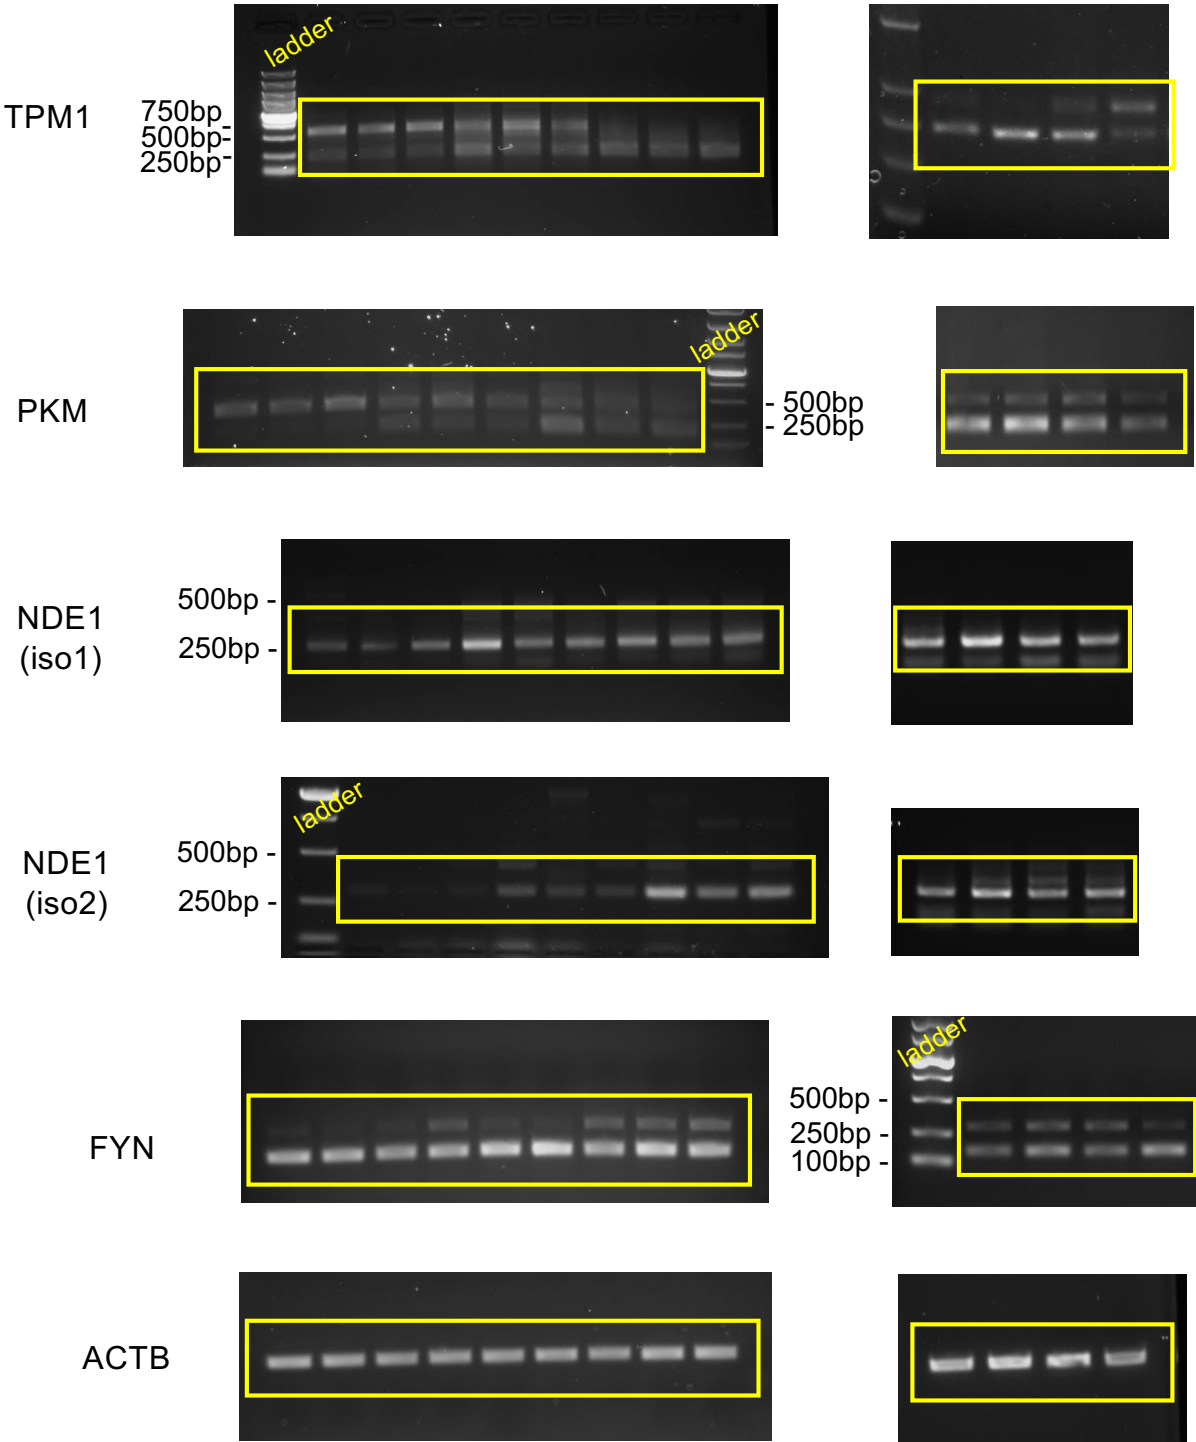

Full unedited gel for Figure 4C

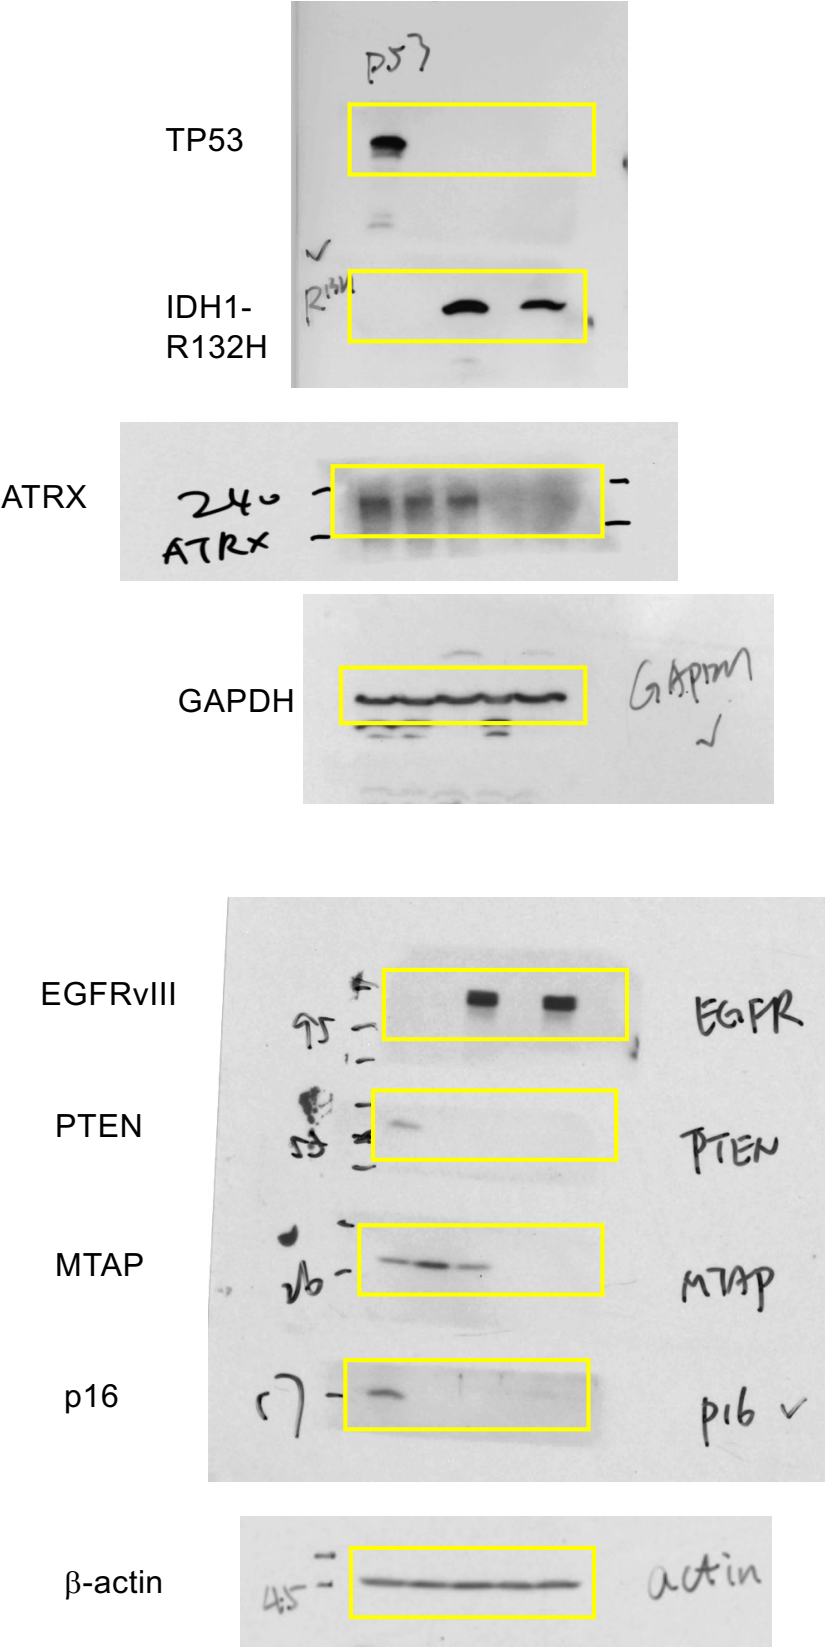

Full unedited gel for Figure 5F

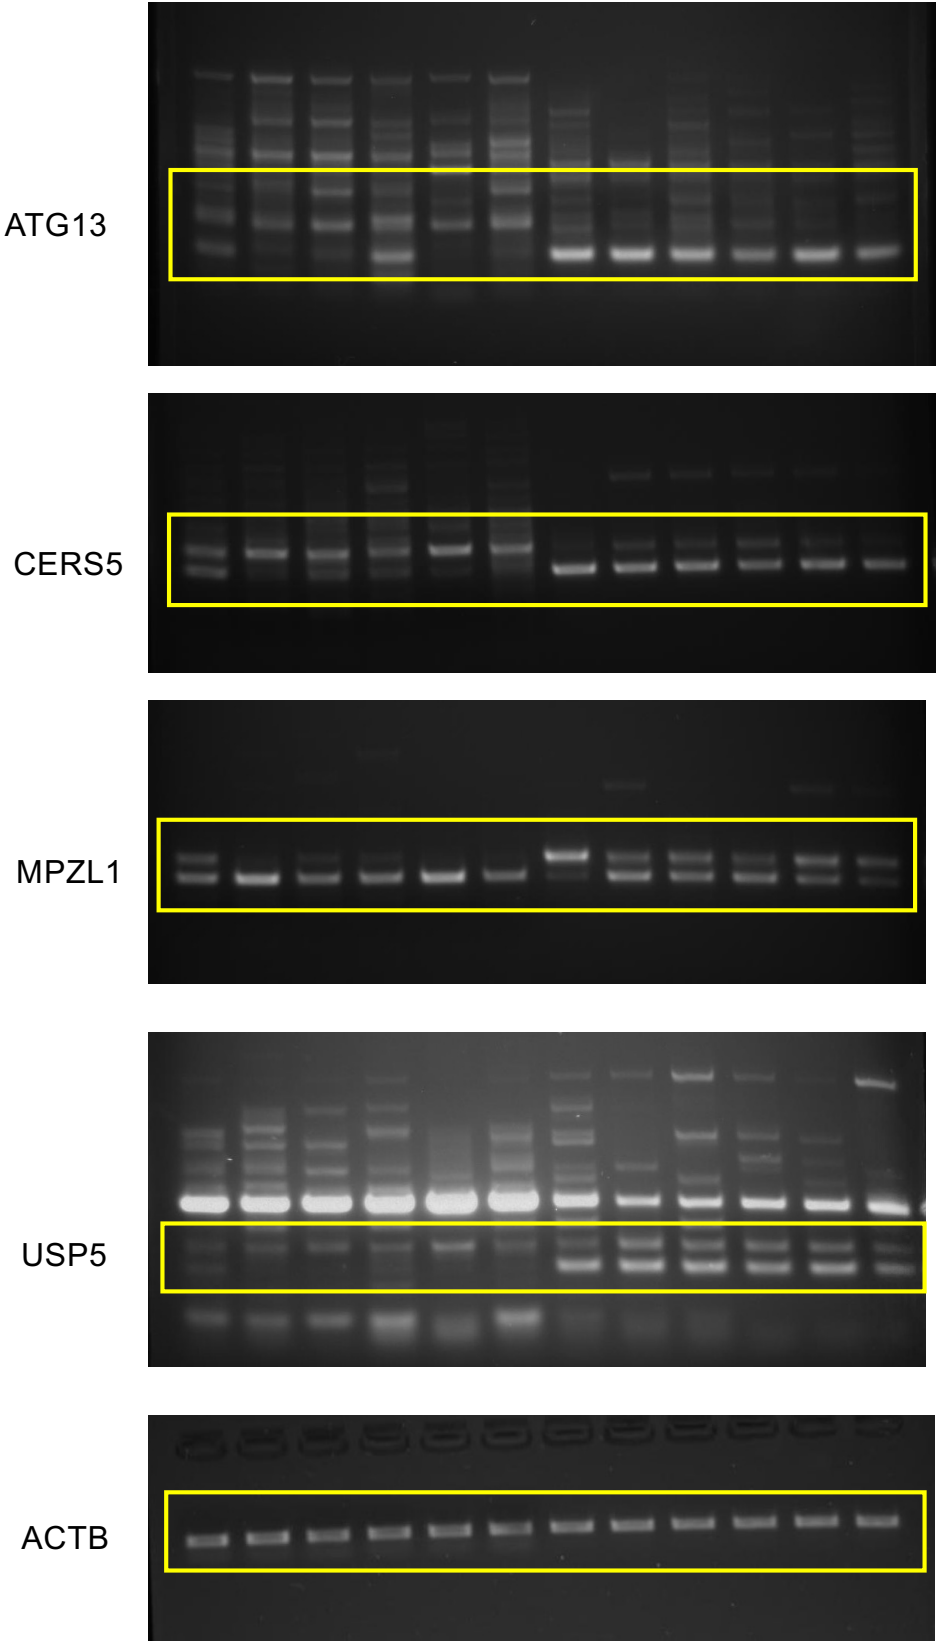

Full unedited gel for Figure 6G

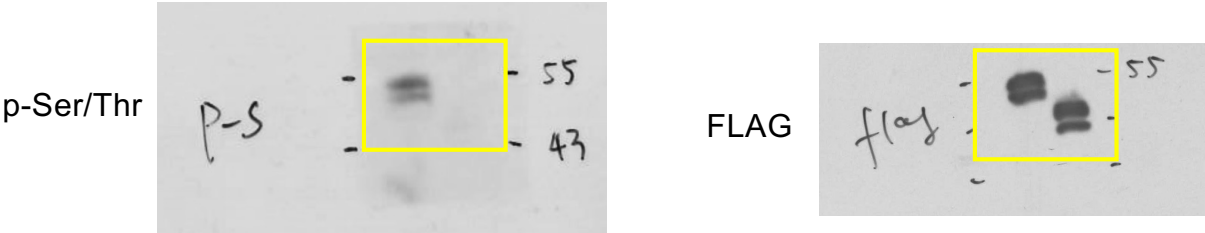

Full unedited gel for Figure 7B

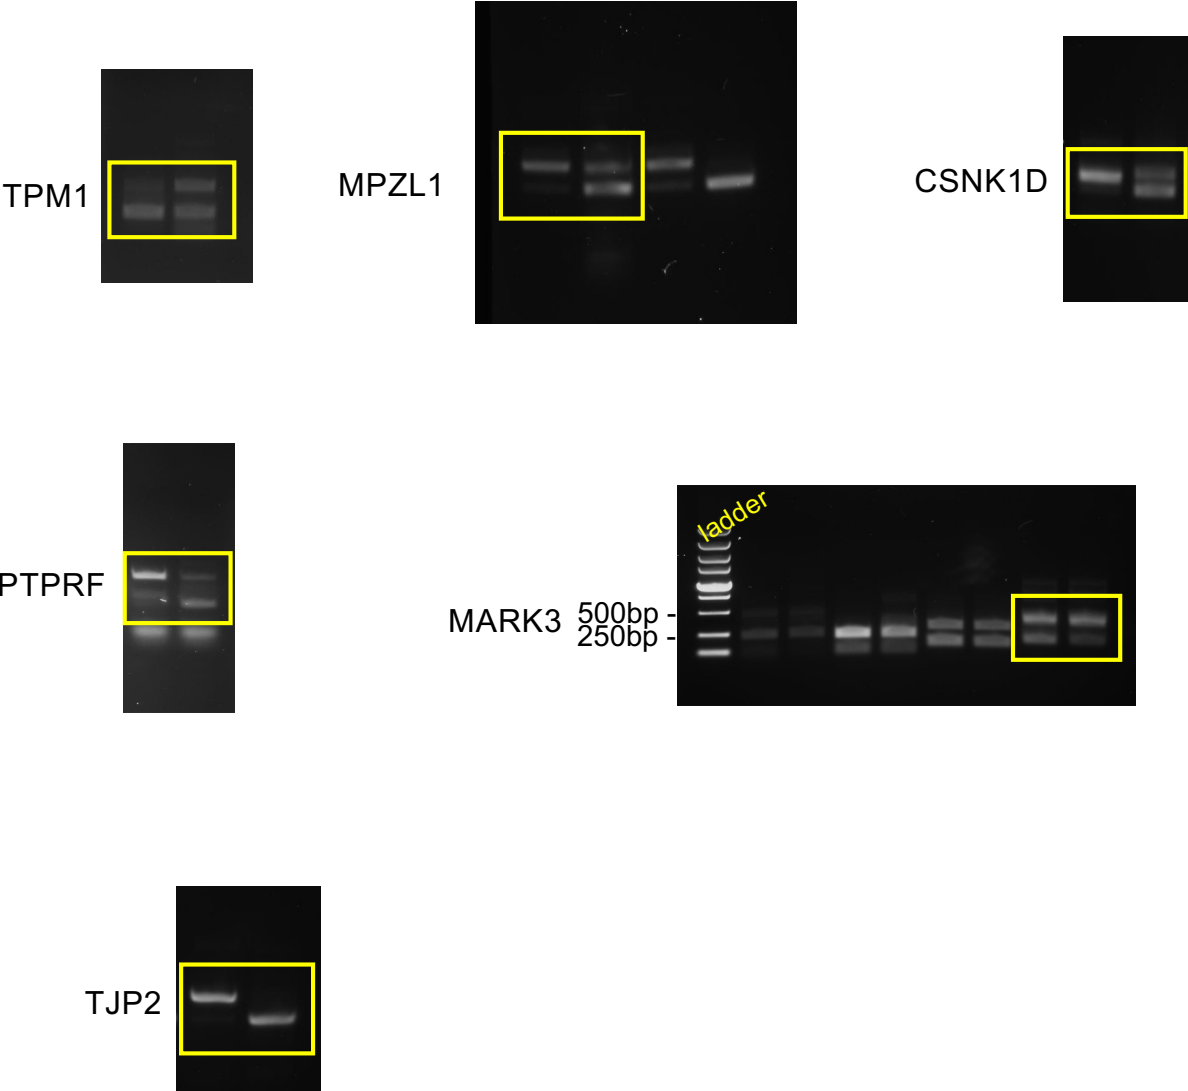

Full unedited gel for Figure 7C

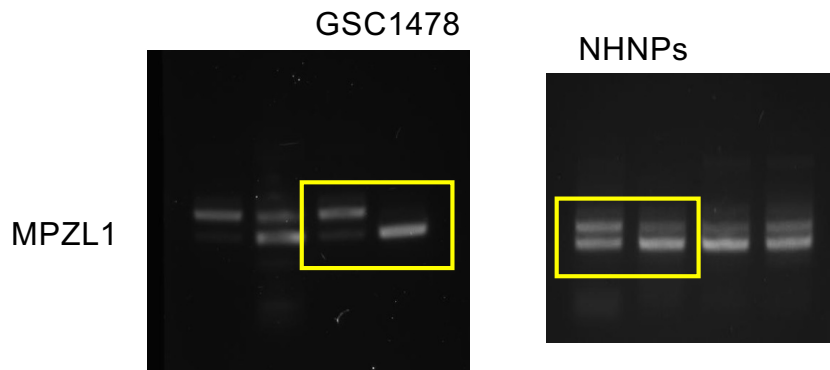

Full unedited gel for Figure 7G

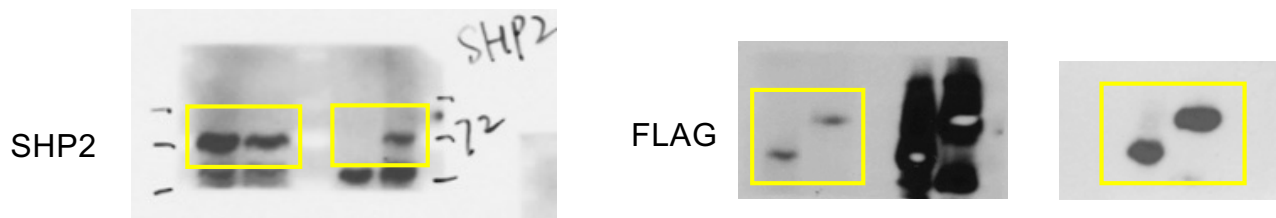

Full unedited gel for Figure 7H

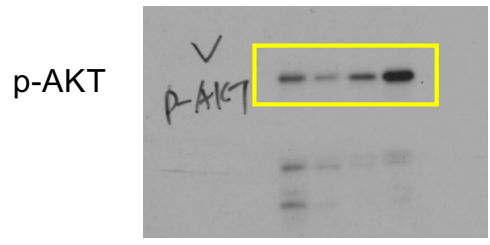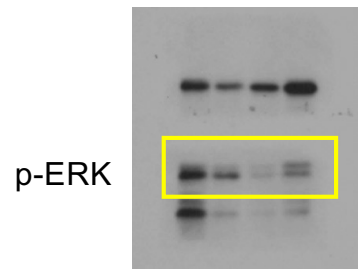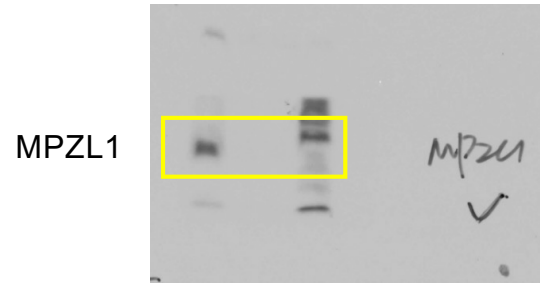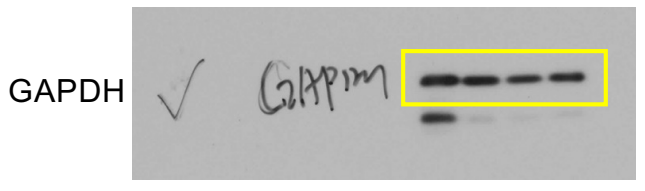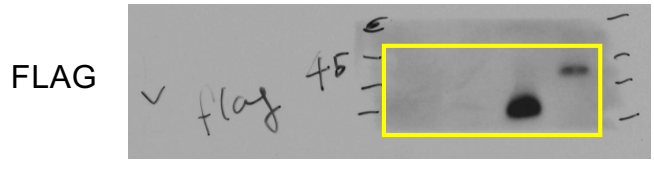

Full unedited gel for Figure 8C

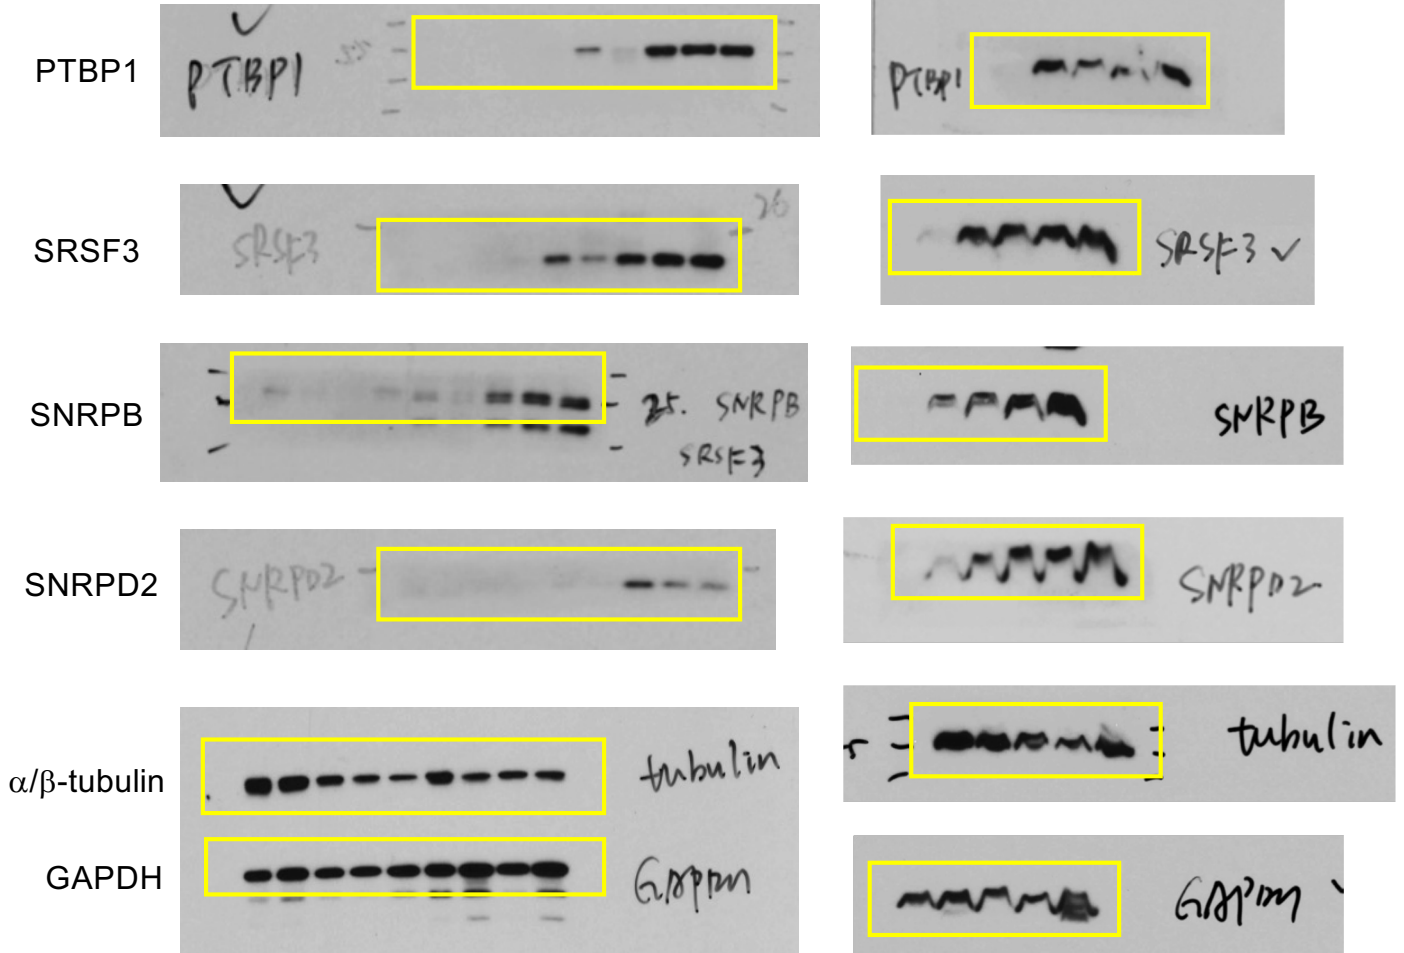



Full unedited gel for Figure 8E

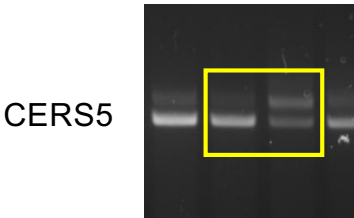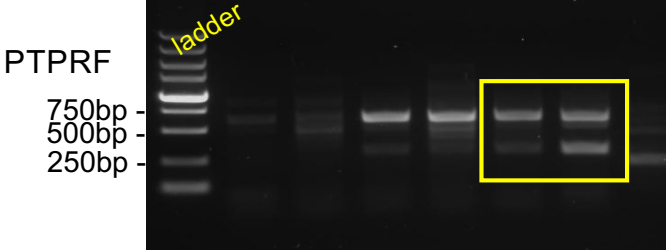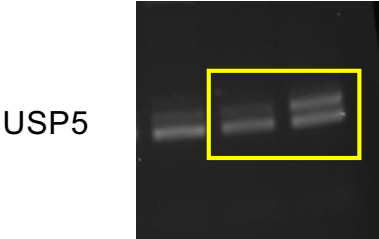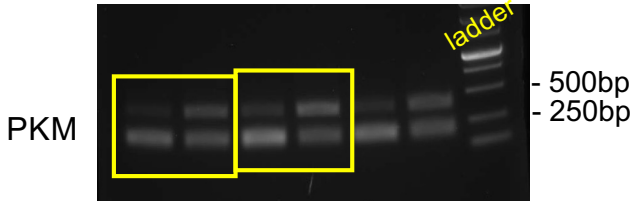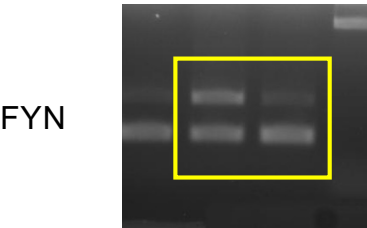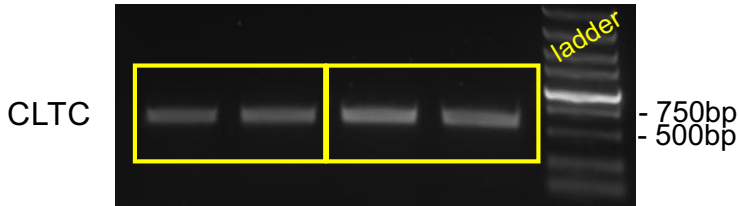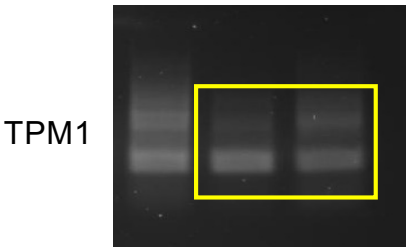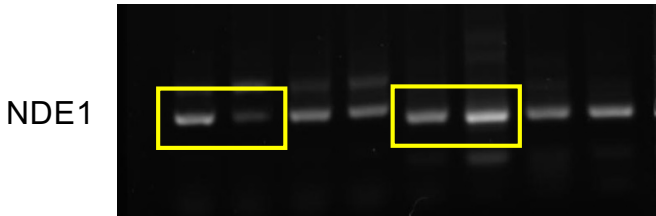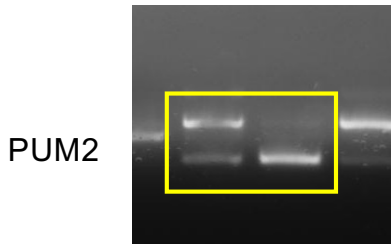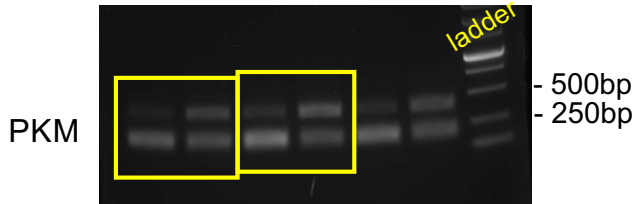

Full unedited gel for Figure 9A

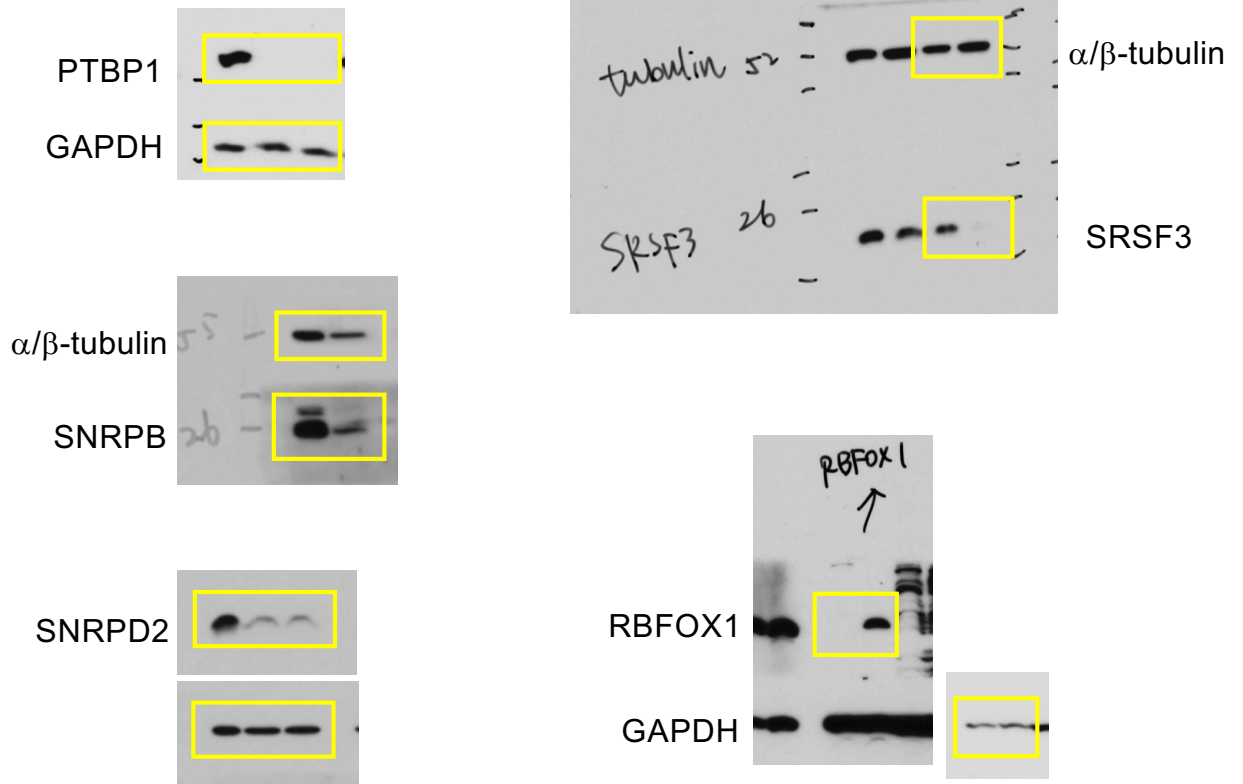

Full unedited gel for Figure 9C, right panel

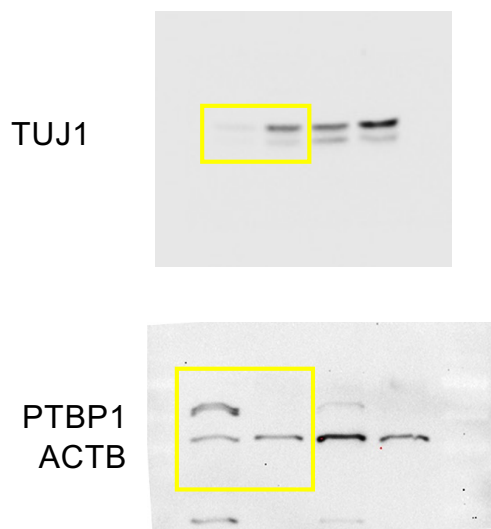

Full unedited gel for Figure 9D

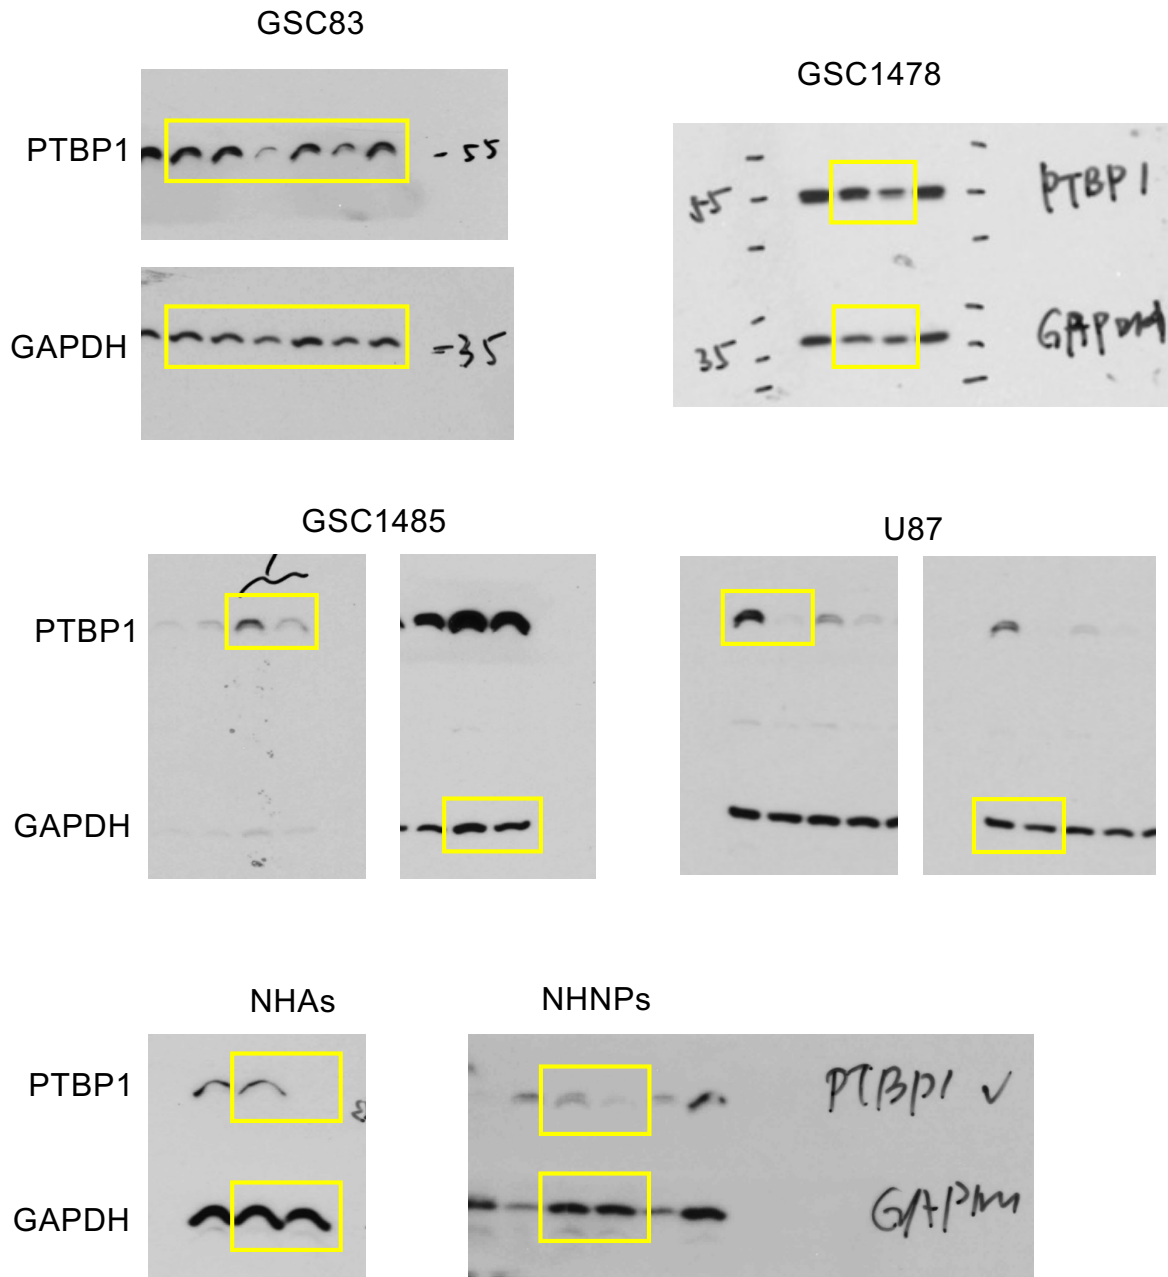

Full unedited gel for Figure 9E

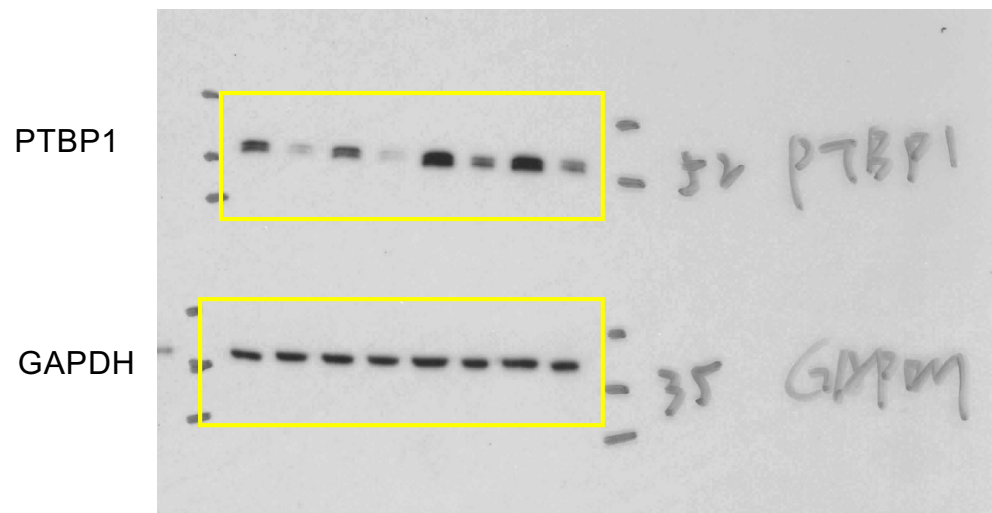

Full unedited gel for Supplemental Figure 4D

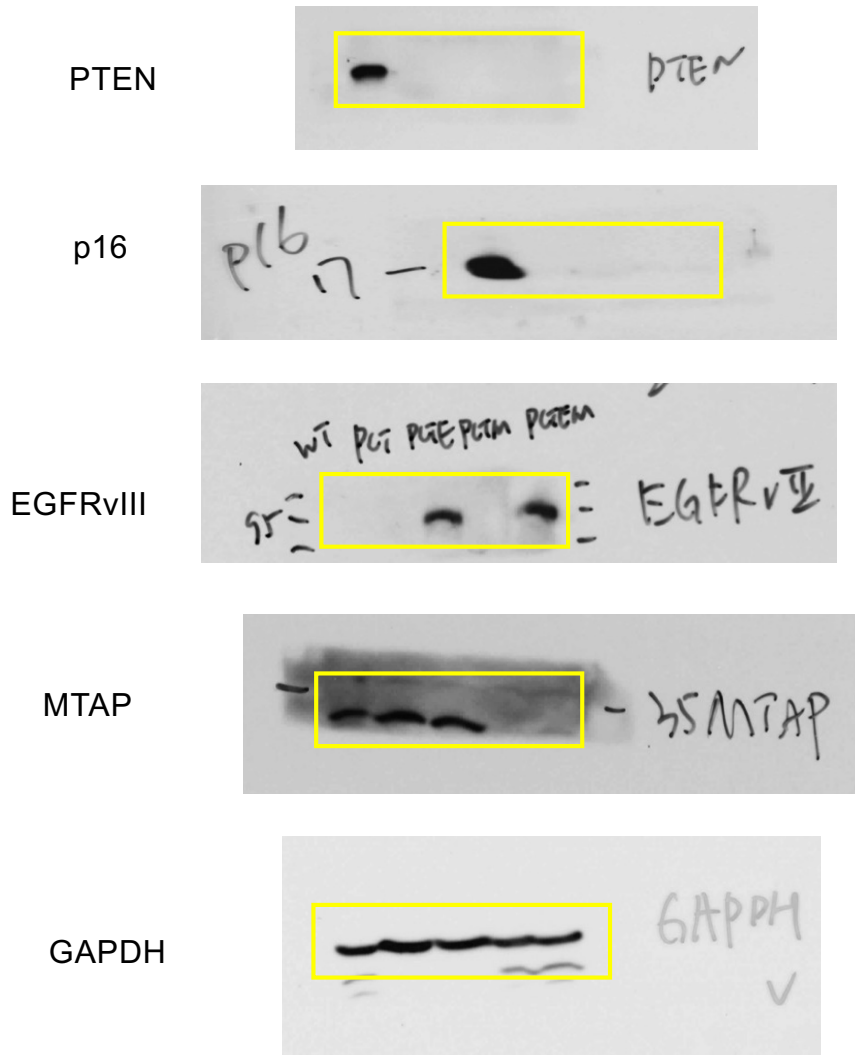

Full unedited gel for Supplemental Figure 4G

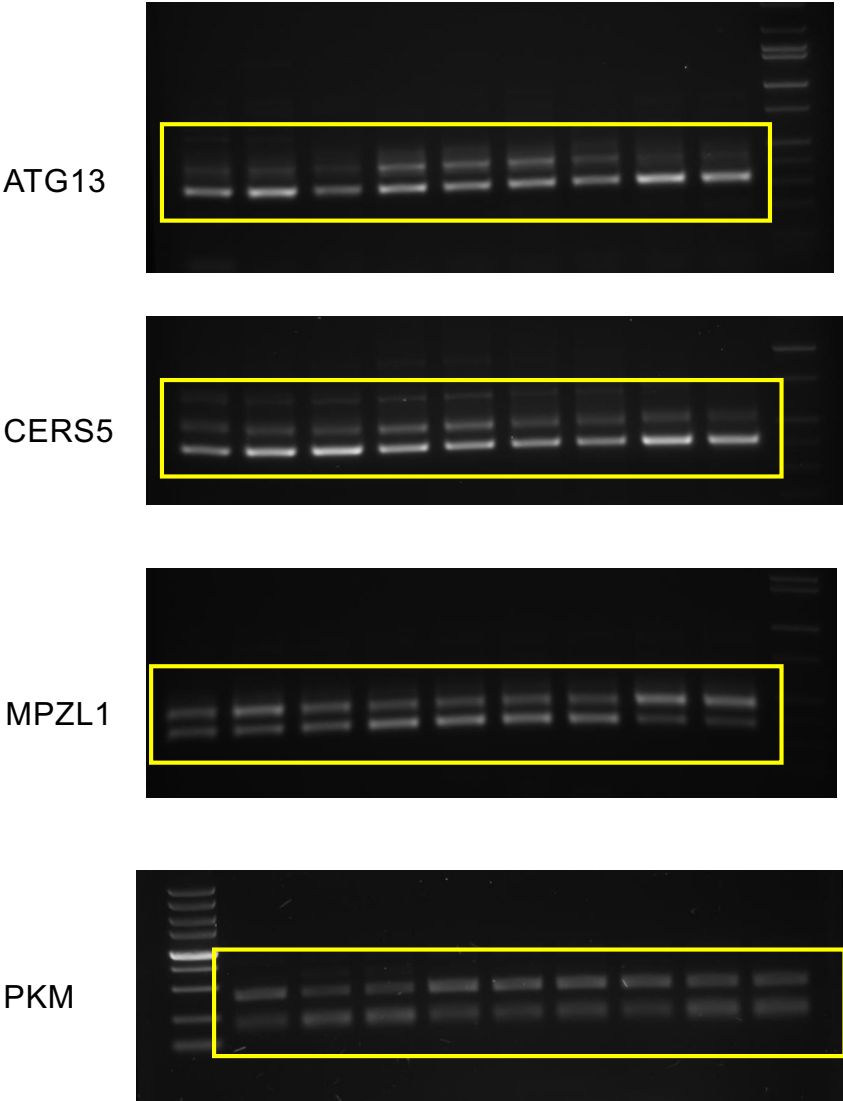

Full unedited gel for Supplemental Figure 4J

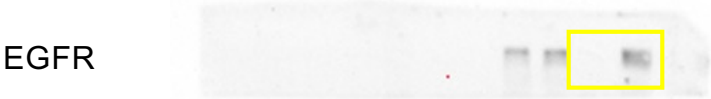

Full unedited gel for Supplemental Figure 4K

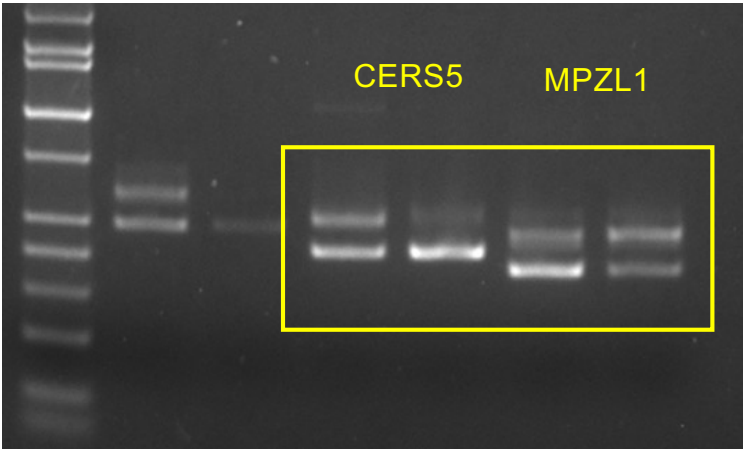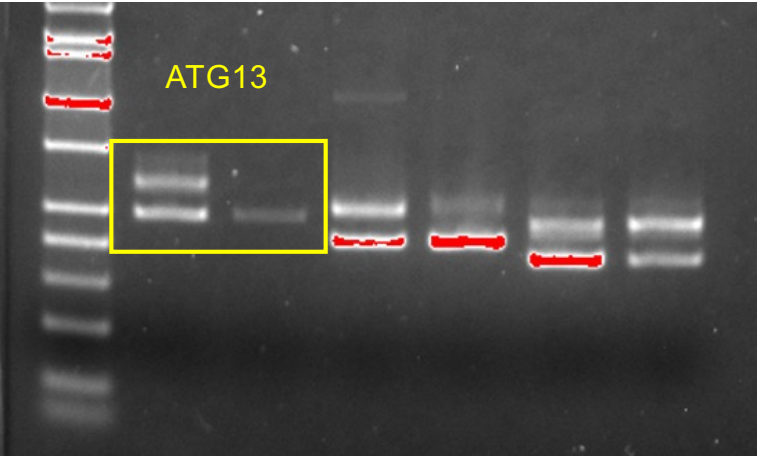

Full unedited gel for Supplemental Figure 4L

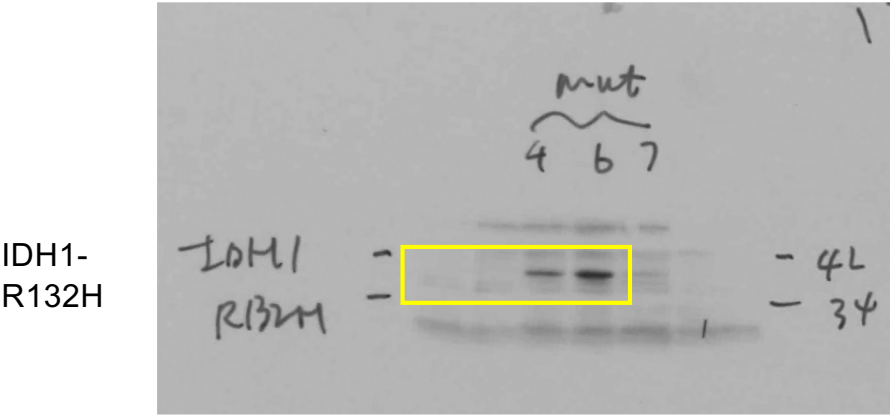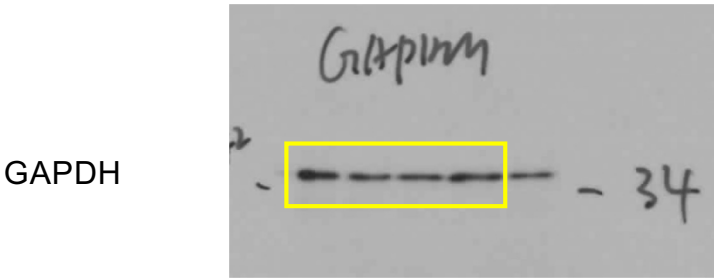

Full unedited gel for Supplemental Figure 4O

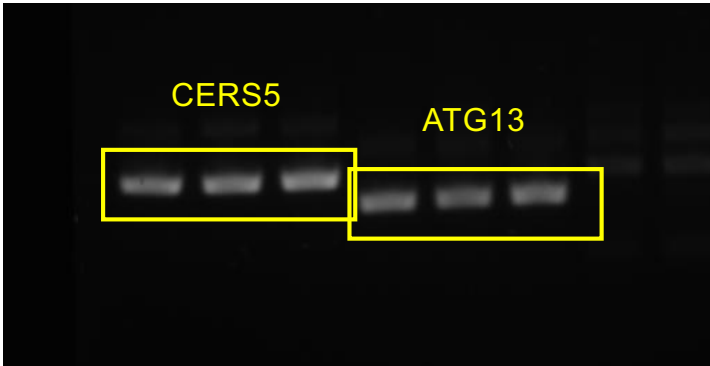



Full unedited gel for Supplemental Figure 5E

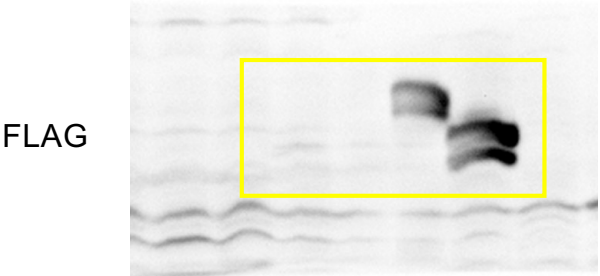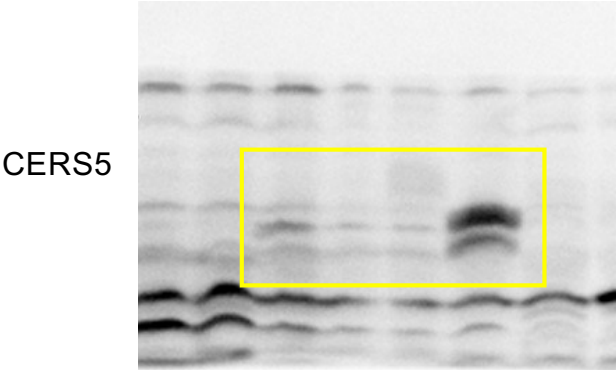

Full unedited gel for Supplemental Figure 5L

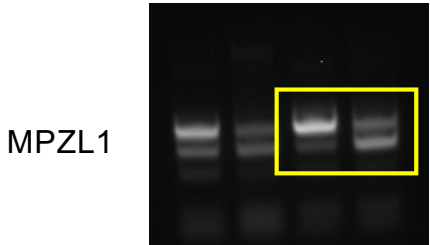

Full unedited gel for Supplemental Figure 5M

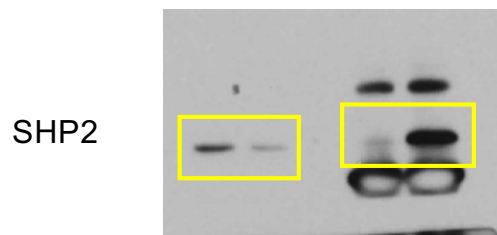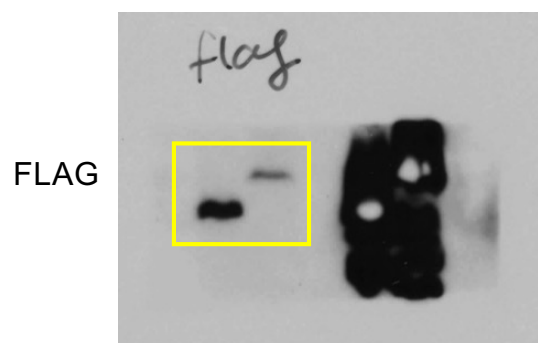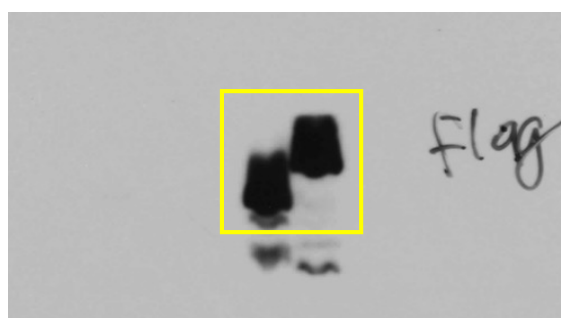

Full unedited gel for Supplemental Figure 7A

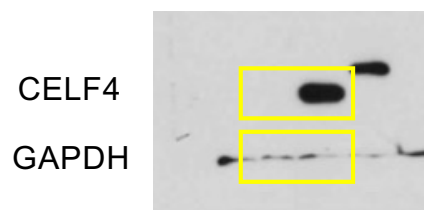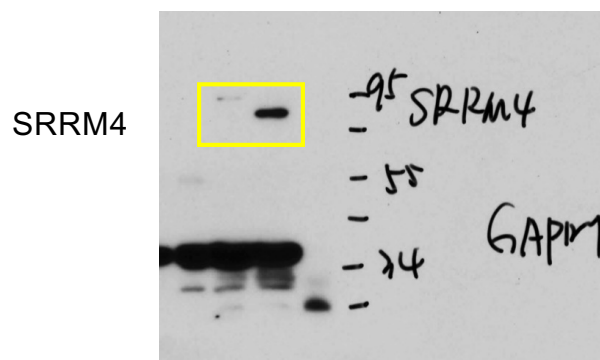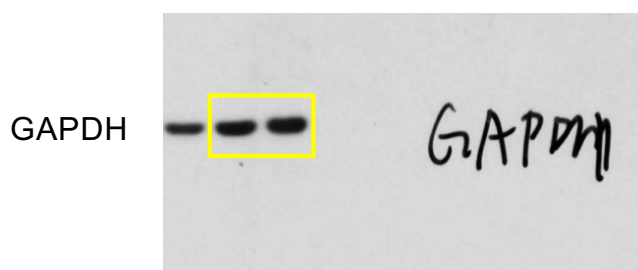

Full unedited gel for Supplemental Figure 7B, left panel

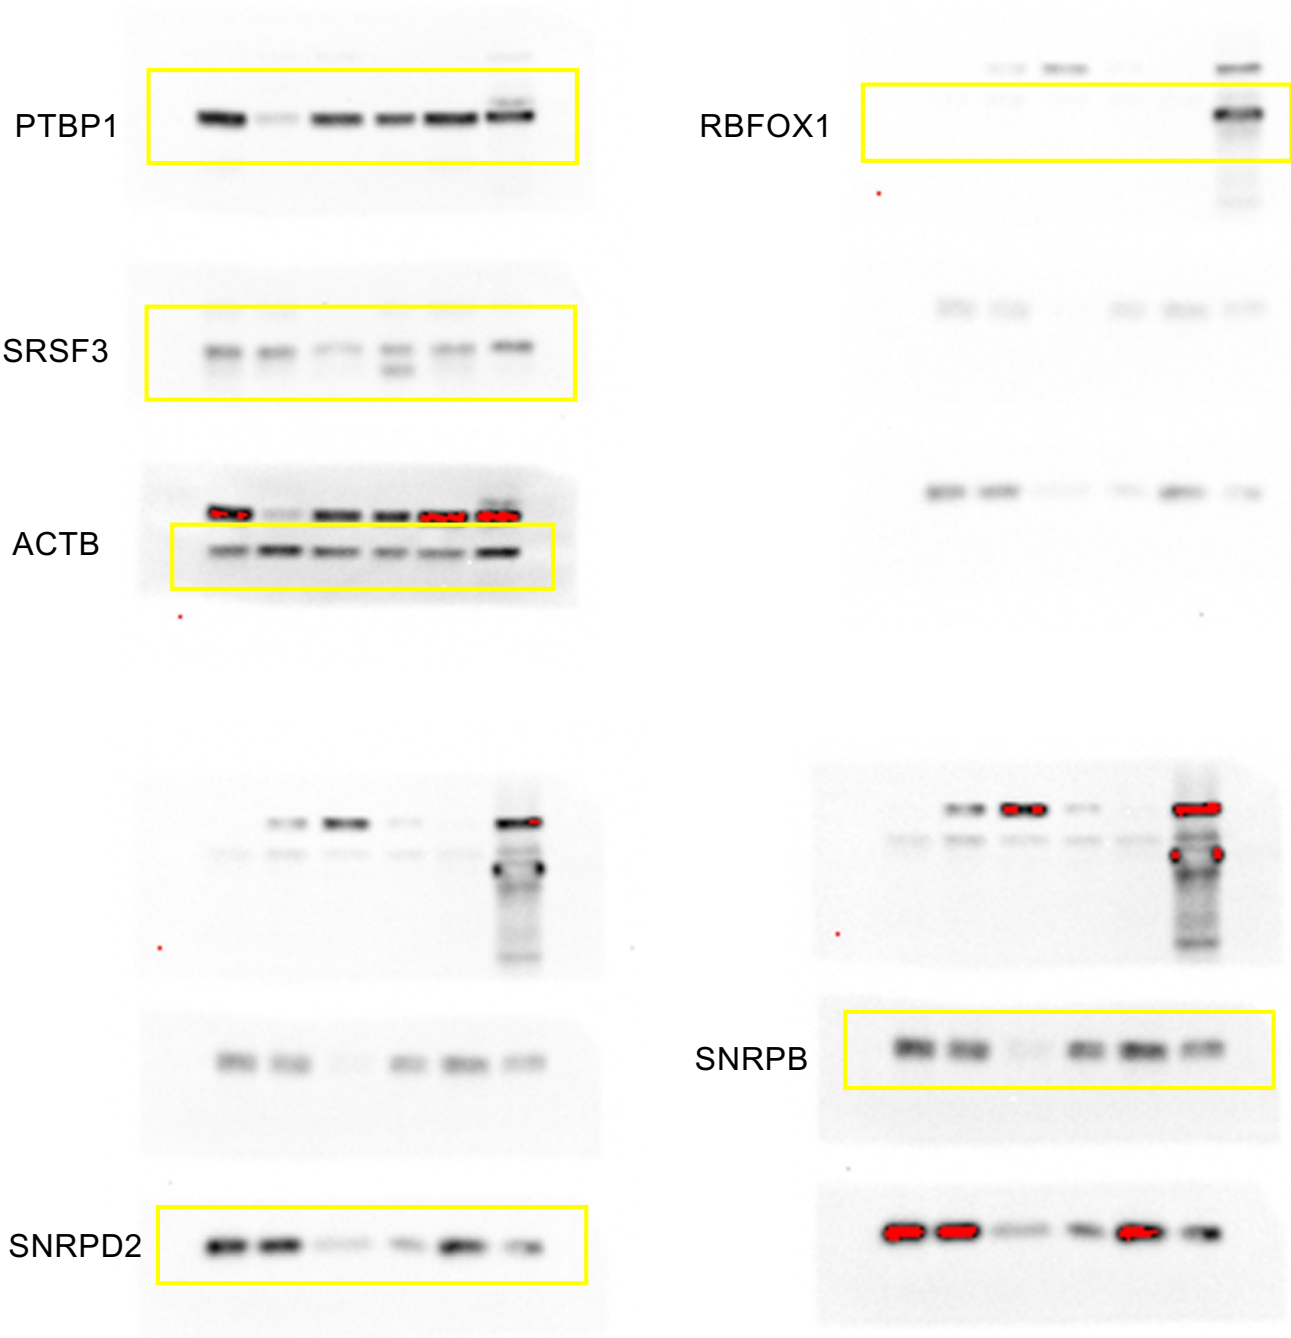

Full unedited gel for Supplemental Figure 7B, right panel

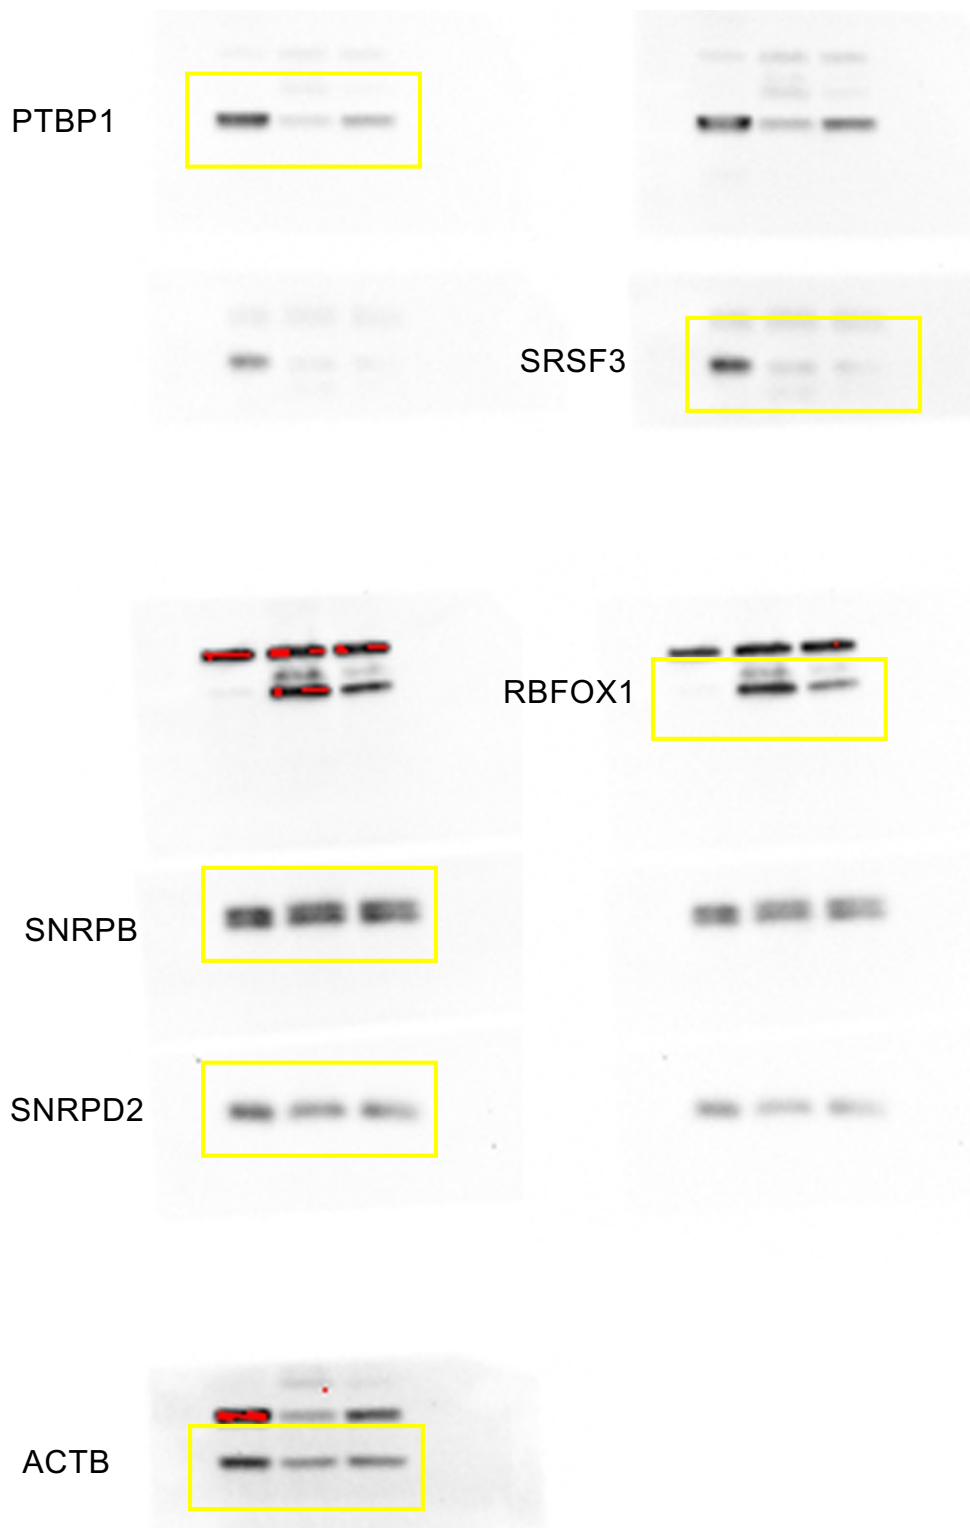

Full unedited gel for Supplemental Figure 7F

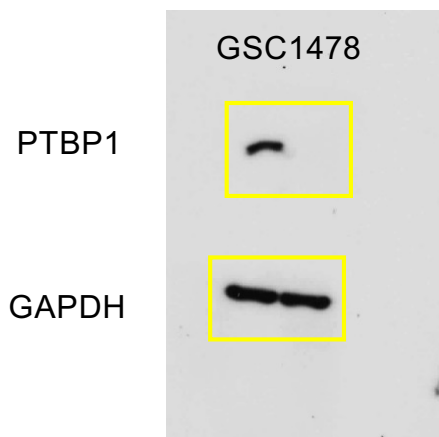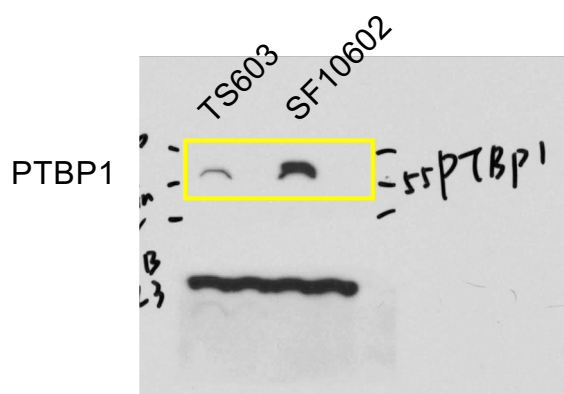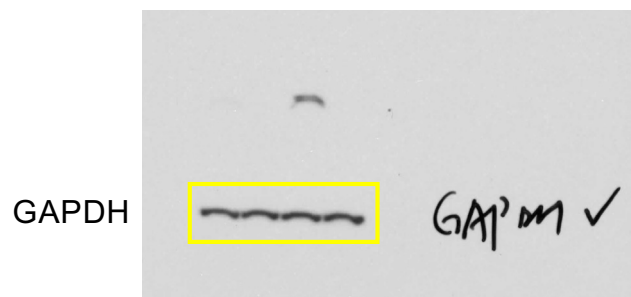

Supplement: jci-134-173789-s101.pdf [file jci-134-173789-s101.pdf]
